# Supplementary material
Source: MDPI journal article supplement (https://www.mdpi.com/2073-4395/11/9/1828)
Supplement: s1 [file s1]

**Table S1.** The pesticides used for common insect pests and diseases.

| Vegetable Species | Common Insect Pests and Diseases | Pesticides                | Dosage Form | Dilution Ratio | Safe Interval Period of Pesticides (d) |
|-------------------|----------------------------------|---------------------------|-------------|----------------|----------------------------------------|
| Cucumber          | Downy mildew                     | Dimethomorph              | 50% WP      | 1500           | 1                                      |
|                   |                                  | Cymoxanil                 | 50% WP      | 2000           | 1                                      |
|                   |                                  | Propamocarb hydrochloride | 72.2% AS    | 800            | 3                                      |
|                   | Corynespora target spot          | Mancozeb                  | 80.0% WG    | 1000           | 15                                     |
|                   | Angular leaf spot                | Zhongshengmycin           | 3% WP       | 600            | 3                                      |
|                   | Scab                             | Flusilazole               | 40% EC      | 8000           | 1                                      |
|                   |                                  | Azoxystrobin              | 25% SC      | 1000           | 3                                      |
|                   | Fusarium wilt                    | Thiram                    | 50% WP      | 600            | 7                                      |
|                   |                                  | Thiophanate-Methyl        | 70% WP      | 600            | 1                                      |
|                   | Powdery mildew                   | Flusilazole               | 40% EC      | 8000           | 2                                      |
|                   |                                  | Kresoxim-methyl           | 50% WG      | 4000           | 1                                      |
|                   |                                  | Pyraclostrobin            | 25% EC      | 2500           | 1                                      |
|                   | Anthracnose                      | Prochloraz                | 50% WP      | 1500           | 1                                      |
|                   |                                  | Chlorothalonil            | 75% WP      | 500            | 7                                      |
|                   |                                  | Azoxystrobin              | 25% SC      | 2000           | 3                                      |
|                   | Thrips                           | Blue sticky trap          | -           | -              | -                                      |
|                   |                                  | 80 mesh insect proof net  | -           | -              | -                                      |
|                   |                                  | Spinosad                  | 2.5% EC     | 1000           | 1                                      |
|                   |                                  | Imidacloprid              | 10% WP      | 2000           | 1                                      |
|                   | Aphids                           | Yellow sticky trap        | -           | -              | -                                      |
|                   |                                  | 80 mesh insect proof net  | -           | -              | -                                      |
|                   |                                  | Imidacloprid              | 10.0% WP    | 2000           | 1                                      |
|                   |                                  | Acetamiprid               | 3% EC       | 1500           | 1                                      |
|                   |                                  | Alphacypermethrin         | 5% EC       | 5000-8000      | 3                                      |
| Tomato            | Early blight                     | Iprodione                 | 50% WP      | 600            | 7                                      |
|                   |                                  | Difenoconazole            | 10% WG      | 1000           | 7                                      |
|                   |                                  | Azoxystrobin              | 25% SC      | 2000           | 3                                      |
|                   | Late blight                      | Dimethomorph              | 50% WP      | 1500           | 1                                      |
|                   |                                  | Cymoxanil                 | 50% WP      | 2000           | 1                                      |
|                   |                                  | Propamocarb hydrochloride | 72.2% AS    | 800            | 7                                      |
|                   | Gray mould                       | Procymidone               | 50.0% WP    | 1000           | 1                                      |
|                   |                                  | Vinchlozoline             | 50% SC      | 800            | 4                                      |
|                   | Powdery mildew                   | Flusilazole               | 40% EC      | 8000           | 2                                      |
|                   |                                  | Kresoxim-methyl           | 50% WG      | 4000           | 1                                      |
|                   |                                  | Pyraclostrobin            | 25% EC      | 2500           | 1                                      |
|                   | Tobacco mosaic virus             | Ningnanmycin              | 10% SP      | 1000           | 5                                      |
|                   | Cucumber mosaic virus            | Ningnanmycin              | 10% SP      | 1000           | 5                                      |
|                   | Tomato spotted wilt virus        | Ningnanmycin              | 10% SP      | 1000           | 5                                      |
|                   | Aphids                           | Yellow sticky trap        | -           | -              | -                                      |

|            |                          |         |           |   |
|------------|--------------------------|---------|-----------|---|
|            | 80 mesh insect proof net | -       | -         | - |
|            | Imidacloprid             | 10% WP  | 2000      | 7 |
|            | Acetamiprid              | 3% EC   | 1500      | 7 |
|            | Pirimicarb               | 50% WP  | 4000      | 1 |
|            | Alphacypermethrin        | 5% EC   | 5000–8000 | 7 |
| Leaf miner | Yellow sticky trap       | -       | -         | - |
|            | 80 mesh insect proof net | -       | -         | - |
|            | Cyromazine               | 10% SC  | 800       | 7 |
|            | Alphacypermethrin        | 5% EC   | 5000–8000 | 7 |
| Whitefly   | Yellow sticky trap       | -       | -         | - |
|            | 60 mesh insect proof net | -       | -         | - |
|            | Bifenthrin               | 2.5% EC | 2000      | 1 |
|            | Imidacloprid             | 10% WP  | 2000      | 7 |
|            | Acetamiprid              | 3% EC   | 1500      | 7 |

AS, aqueous solution; EC, emulsifiable concentrate; SC, suspension concentrate; SP, soluble powder; WG, water-dispersible granule; WP, wettable powder. The pesticides were alternately used according to their safe interval period.

**Table S2.** The relative abundances of main harmful microbial genera.

| Sampling Time         | Treatments | <i>Cladosporium</i> (%) | <i>Verticillium</i> (%) | <i>Fusarium</i> (%) |
|-----------------------|------------|-------------------------|-------------------------|---------------------|
| 5th post (2020.09.01) | CK         | 0.21                    | 0.01                    | 0.02                |
|                       | R          | 0.25                    | 0.04                    | 0.05                |
| 6th pre (2020.12.21)  | CK         | 0.79                    | 0.64                    | 0.04                |
|                       | R          | 0.78                    | 1.05                    | 0.04                |

CK, the non-vegetable residue treatment; R, the vegetable residue treatment; pre, the pre-returning stage; post, the post-returning stage; number 5 and 6, the times of in situ vegetable residue return.
